# Supplementary material for: Incorporation of Alternative Ultrasound Biomarkers into Myometrial Invasion-based Model better Predicts Lymph Node Metastasis in Endometrial Cancer: Evidence and Future Prospects
Source: Preprints.org preprint supplement (doi:10.20944/preprints202208.0147.v1), 2022-08-08
Supplement: Supplementary file 1 [file Supplementary material 1_Figure S1.docx]

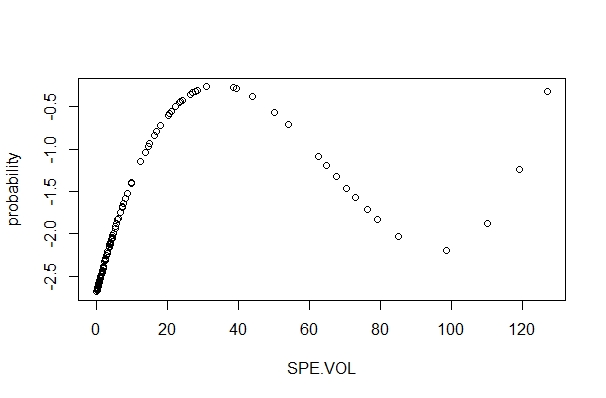


**Figure S1.** Tumor volume measured by ultrasound in relation to the probability of metastases to lymph nodes in the study group of 116 women with endometrial cancer.
