# Supplementary material for: Incorporation of Alternative Ultrasound Biomarkers into Myometrial Invasion-based Model better Predicts Lymph Node Metastasis in Endometrial Cancer: Evidence and Future Prospects
Source: Preprints.org preprint supplement (doi:10.20944/preprints202208.0147.v1), 2022-08-08
Supplement: Supplementary file 2 [file Supplementary material 2_Table S1_low risk EC.docx]

**Table S2.** Univariate logit models (models D’-I) and multivariate logit model (model J) for low-risk group (n=82).

| Model | Covariate | Est. | Std. Error | p-value | AIC | ACC | AUC (95% CI) | p-value (LRT) |
| --- | --- | --- | --- | --- | --- | --- | --- | --- |
| A’‘ | (Intercept)  SPE-VOL | -2.71  -0.01 | 0.50  0.02 | 0.000  0.422 | 46.39 | 0.768 | 0.605 (0.317–0.894) | 0.462 |
| B’‘ | (Intercept)  AREA | -2.79  -0.05 | 0.55  0.06 | 0.000  0.410 | 46.34 | 0.561 | 0.480 (0.182–0.778) | 0.444 |
| C’‘ | (Intercept)  uTFD | -1.15  -0.22 | 0.79  0.13 | 0.145  0.096 | 43.11 | 0.683 | 0.712 (0.562–0.862) | 0.051 |
| D’‘ | (Intercept) | -2.53 | 0.73 | 0.000 | 47.13 | 0.829 | 0.625 (0.315–0.935) |  |
|  | bs(SPE.VOL)1 | -5.90 | 8.05 | 0.463 |  |
|  | bs(SPE.VOL)2 | 31.17 | 27.0 | 0.248 | 0.284 |
|  | bs(SPE.VOL)3 | -63.13 | 66.4 | 0.342 |  |  |  |  |
| E’‘ | (Intercept) | -1.57 | 0.81 | 0.052 | 45.25 | 0.488 | 0.737 (0.524–0.950) |  |
|  | bs(AREA)1 | -12.19 | 7.05 | 0.084 |  |
|  | bs(AREA)2 | 24.92 | 12.86 | 0.053 | 0.128 |
|  | bs(AREA)3 | -29.82 | 20.88 | 0.153 |  |  |  |  |
| F’‘ | (Intercept) | -4.15 | 2.57 | 0.106 | 52.57 | 0.720 | 0.786 (0.626–0.947) |  |
|  | bs(uTFD)1 | 10.00 | 9.44 | 0.289 |  |
|  | bs(uTFD)2 | -12.25 | 10.95 | 0.263 | 0.104 |
|  | bs(uTFD)3 | -1.68 | 18.29 | 0.927 |  |
| G’‘ | (Intercept) | -3.00 | 0.59 | 0.000 | 44.70 | 0.768 | 0.645 (0.421–0.869) |  |
|  | uMI | 1.32 | 0.86 | 0.126 | 0.135 |
| H’‘ | (Intercept) | -3.31 | 0.72 | 0.000 | 43.31 | 0.720 | 0.695 (0.483–0.908) |  |
|  | EMIR | 1.66 | 0.90 | 0.067 | 0.057 |
| I’‘ | (Intercept) | -2.47 | 0.43 | 0.000 | 46.14 | 0.134 | 0.533 (0.505–0.561) |  |
|  | uCSI | -15.10 | 1769.26 | 0.993 | 0.376 |
| J” | (Intercept)  Size | -3.54  0.79 | 1.28  0.92 | 0.006  0.385 | 46.24 | 0.780 | 0.575 (0.363–0.786) | 0.405 |
| K’‘ | (Intercept) | -3.11 | 0.59 | 0.000 | 42.27 | 0.854 | 0.691 (0.469–0.913) |  |
|  | uMI:EMIR | 2.01 | 0.89 | 0.024 | 0.031 |
